# Supplementary material
Source: HighWire-hosted journal article supplement (https://gh.bmj.com/content/2/3/e000348)
Supplement: inline-supplementary-material-1 [file inline-supplementary-material-1.pdf]

## Supplementary Material

### Quantifying Unmet Need for Hypertension Care in South Africa through a Care Cascade: Evidence from the SANHANES, 2011-2012

Kaitlyn M. Berry<sup>1</sup>, Whadi-ah Parker<sup>2</sup>, Zandile Mchiza<sup>2</sup>, Ronel Sewpaul<sup>2</sup>, Demetre Labadarios<sup>2</sup>,  
Sydney Rosen<sup>1 3</sup>, Andrew Stokes<sup>1</sup>

#### Figures:

Figure A1. Exclusion criteria flow chart.....2

#### Tables:

Table A1. Decomposition analysis results: Hypertension prevalence, screening, diagnosis, treatment and control, South African adults aged 15 and above, 2011-2012.....3-4

Table A2. Characteristics of the analytic study sample and the excluded participants.....5

\* This supplementary material was provided by the authors to give readers further details on their article

**Figure A1: Exclusion Criteria Flow Chart:**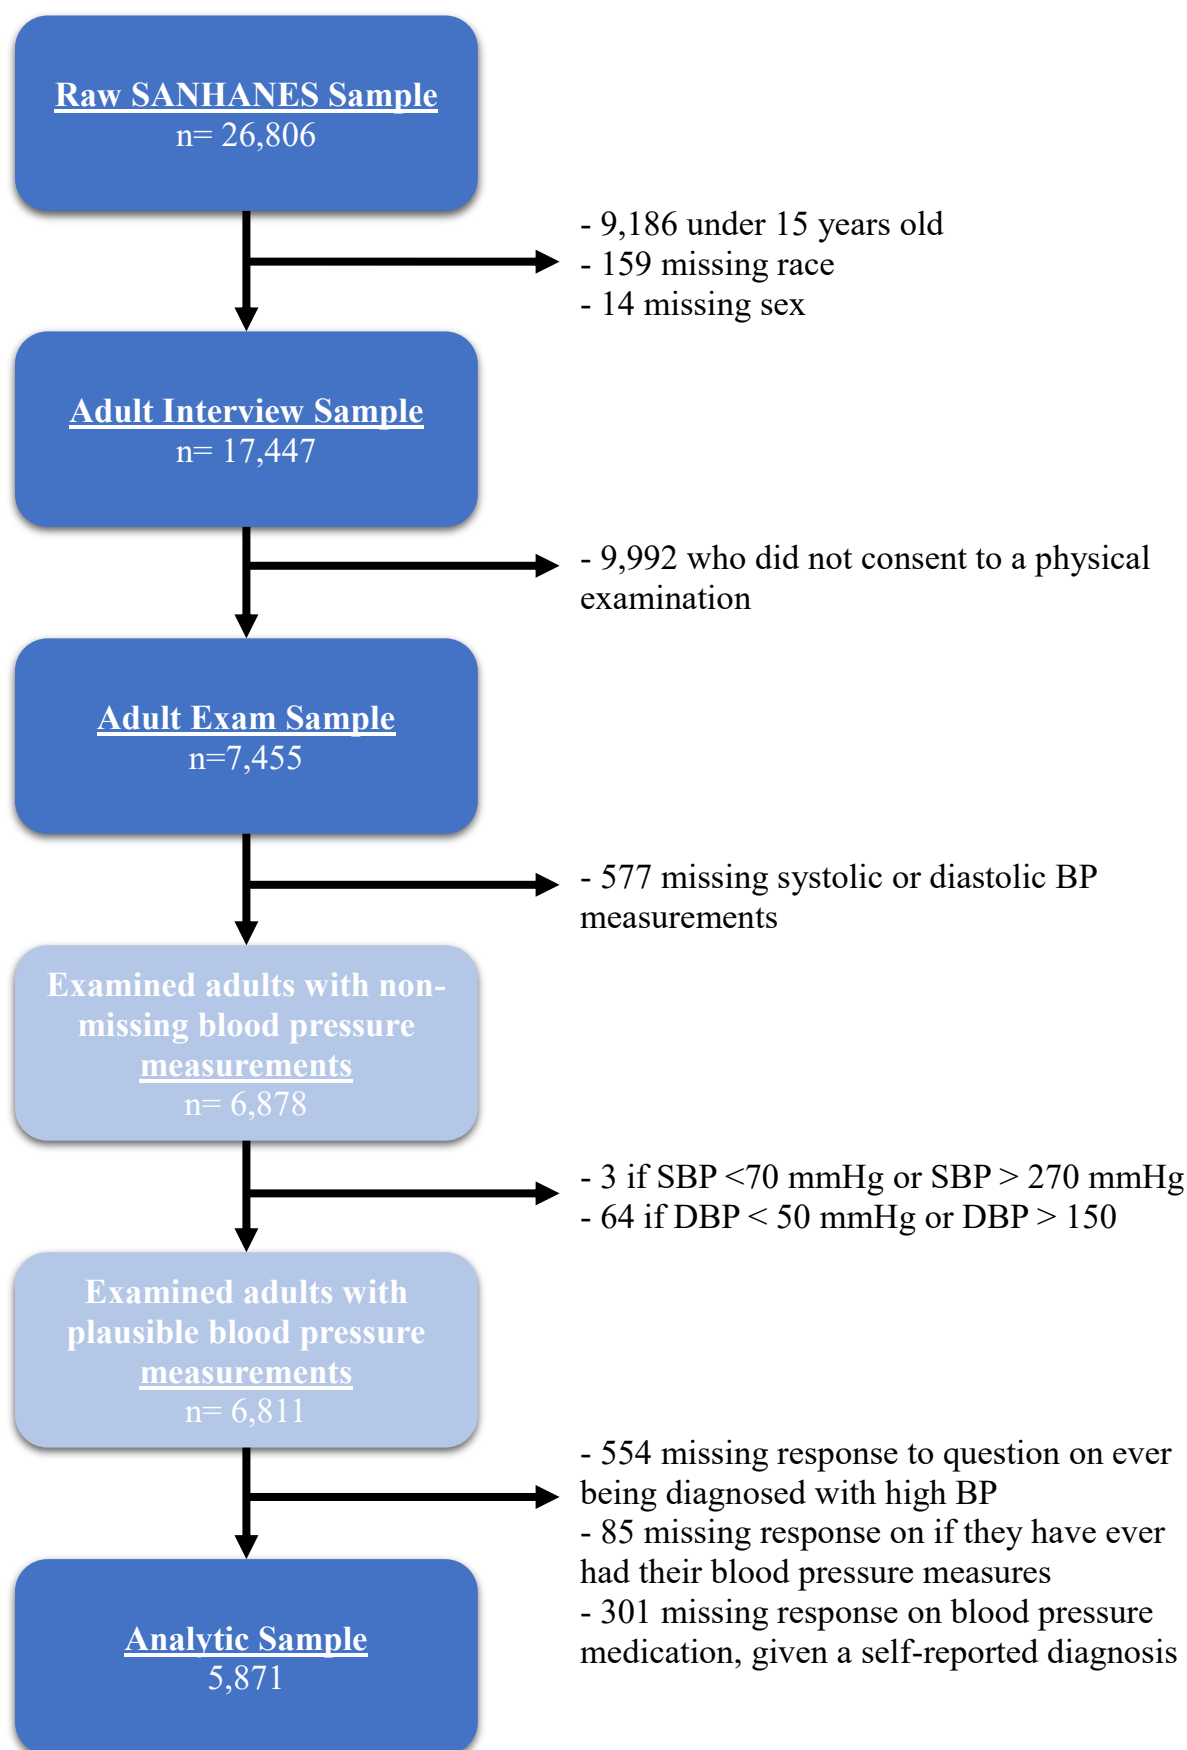

**Table A1.** Hypertension prevalence, screening, diagnosis, treatment and control, South African adults aged 15 and above, 2011-2012

|                  | Total Hypertension |     | Unscreened, Undiagnosed |     |           | Screened, Undiagnosed |     |           | Diagnosed, Untreated |     |           | Treated, Uncontrolled |     |           | Treated, Controlled |     |           |
|------------------|--------------------|-----|-------------------------|-----|-----------|-----------------------|-----|-----------|----------------------|-----|-----------|-----------------------|-----|-----------|---------------------|-----|-----------|
|                  | Prev               | SE  | Prev                    | SE  | % of hptn | Prev                  | SE  | % of hptn | Prev                 | SE  | % of hptn | Prev                  | SE  | % of hptn | Prev                | SE  | % of hptn |
| Ages ≥ 15        |                    |     |                         |     |           |                       |     |           |                      |     |           |                       |     |           |                     |     |           |
| Crude            | 35.0               | 1.3 | 13.0                    | 0.8 | 37.1      | 8.4                   | 1.0 | 24.1      | 2.4                  | 0.3 | 6.9       | 7.3                   | 0.5 | 21.0      | 3.8                 | 0.5 | 11.0      |
| Age-standardized | 35.1               | 1.1 | 13.0                    | 0.8 | 48.7      | 8.4                   | 0.9 | 23.1      | 2.5                  | 0.3 | 5.8       | 7.4                   | 0.5 | 13.5      | 3.9                 | 0.5 | 8.9       |
| Age Categories   |                    |     |                         |     |           |                       |     |           |                      |     |           |                       |     |           |                     |     |           |
| 15-24            | 12.5               | 1.2 | 9.1                     | 1.0 | 73.9      | 2.3                   | 0.5 | 18.4      | 0.3                  | 0.1 | 2.3       | 0.1                   | 0.1 | 0.5       | 0.7                 | 0.4 | 4.8       |
| 25-34            | 21.8               | 2.0 | 12.5                    | 1.7 | 58.3      | 3.7                   | 1.0 | 17.8      | 1.5                  | 0.6 | 6.3       | 2.4                   | 0.8 | 10.7      | 1.6                 | 0.6 | 6.9       |
| 35-44            | 37.1               | 3.4 | 12.4                    | 1.8 | 33.4      | 14.5                  | 3.7 | 39.2      | 2.4                  | 0.6 | 6.5       | 4.1                   | 0.9 | 10.9      | 3.6                 | 1.2 | 10.0      |
| 45-54            | 57.3               | 2.9 | 17.6                    | 2.1 | 30.9      | 12.1                  | 1.9 | 21.1      | 5.7                  | 1.0 | 9.9       | 13.1                  | 1.6 | 22.8      | 8.8                 | 1.6 | 15.3      |
| 55-64            | 67.9               | 4.6 | 16.8                    | 2.3 | 24.6      | 15.1                  | 4.9 | 22.7      | 4.1                  | 0.8 | 5.9       | 22.5                  | 2.7 | 33.0      | 9.4                 | 1.6 | 13.8      |
| ≥ 65             | 83.0               | 3.0 | 18.0                    | 2.6 | 21.7      | 17.0                  | 3.0 | 20.6      | 6.3                  | 1.4 | 7.7       | 32.5                  | 3.1 | 39.1      | 9.2                 | 2.0 | 10.9      |
| Sex              |                    |     |                         |     |           |                       |     |           |                      |     |           |                       |     |           |                     |     |           |
| Men              | 35.2               | 1.7 | 16.9                    | 1.4 | 58.5      | 8.5                   | 1.1 | 23.2      | 2.9                  | 0.5 | 6.9       | 4.8                   | 0.5 | 7.9       | 2.1                 | 0.4 | 3.5       |
| Women            | 34.7               | 1.3 | 10.2                    | 0.7 | 39.5      | 7.9                   | 1.2 | 22.4      | 2.2                  | 0.3 | 5.6       | 9.3                   | 0.6 | 18.5      | 5.2                 | 0.8 | 13.9      |
| Sex by Age       |                    |     |                         |     |           |                       |     |           |                      |     |           |                       |     |           |                     |     |           |
| Men              |                    |     |                         |     |           |                       |     |           |                      |     |           |                       |     |           |                     |     |           |
| 15-24            | 16.8               | 2.0 | 13.6                    | 1.9 | 80.8      | 3.0                   | 0.9 | 18.3      | 0.2                  | 0.2 | 0.9       | 0.0                   | 0.0 | 0.0       | 0.0                 | 0.0 | 0.0       |
| 25-34            | 27.1               | 3.7 | 18.9                    | 3.4 | 68.9      | 5.3                   | 1.6 | 19.5      | 2.3                  | 1.3 | 9.1       | 0.6                   | 0.5 | 2.3       | 0.1                 | 0.1 | 0.2       |
| 35-44            | 29.8               | 4.0 | 16.4                    | 3.6 | 55.9      | 9.4                   | 2.3 | 31.9      | 2.7                  | 1.3 | 8.5       | 1.0                   | 0.6 | 2.9       | 0.3                 | 0.2 | 0.9       |
| 45-54            | 51.5               | 5.0 | 18.0                    | 3.4 | 34.9      | 11.7                  | 3.2 | 23.3      | 6.6                  | 1.9 | 12.3      | 8.6                   | 2.1 | 16.5      | 6.6                 | 2.3 | 12.9      |
| 55-64            | 67.3               | 6.5 | 16.9                    | 3.2 | 24.9      | 20.4                  | 8.1 | 31.0      | 3.6                  | 1.2 | 5.2       | 21.3                  | 3.8 | 31.3      | 5.1                 | 1.6 | 7.6       |
| ≥ 65             | 79.4               | 3.8 | 21.5                    | 4.5 | 27.5      | 18.3                  | 4.8 | 22.5      | 7.8                  | 2.5 | 10.5      | 21.6                  | 4.6 | 27.0      | 10.3                | 3.2 | 12.4      |
| Women            |                    |     |                         |     |           |                       |     |           |                      |     |           |                       |     |           |                     |     |           |
| 15-24            | 8.8                | 1.4 | 5.3                     | 1.0 | 62.3      | 1.7                   | 0.7 | 18.7      | 0.4                  | 0.2 | 4.6       | 0.2                   | 0.1 | 1.4       | 1.3                 | 0.6 | 13.1      |
| 25-34            | 18.1               | 2.2 | 8.1                     | 1.3 | 43.4      | 2.6                   | 0.8 | 17.2      | 1.0                  | 0.4 | 4.9       | 3.6                   | 1.3 | 21.8      | 2.7                 | 1.0 | 12.8      |
| 35-44            | 41.1               | 4.6 | 10.2                    | 1.8 | 24.5      | 17.3                  | 5.3 | 42.0      | 2.3                  | 0.7 | 5.8       | 5.8                   | 1.3 | 14.1      | 5.4                 | 1.8 | 13.6      |
| 45-54            | 61.8               | 3.5 | 17.1                    | 2.5 | 27.8      | 12.6                  | 2.3 | 20.3      | 4.8                  | 1.1 | 7.8       | 16.7                  | 1.8 | 27.0      | 10.6                | 2.1 | 17.1      |
| 55-64            | 68.4               | 3.6 | 17.2                    | 2.6 | 25.4      | 8.9                   | 1.9 | 13.0      | 4.7                  | 1.0 | 6.8       | 24.2                  | 2.9 | 35.4      | 13.4                | 2.5 | 19.4      |
| ≥ 65             | 84.3               | 3.4 | 14.8                    | 2.2 | 17.5      | 15.1                  | 4.2 | 18.0      | 5.1                  | 1.5 | 6.0       | 41.6                  | 4.1 | 49.4      | 7.6                 | 1.6 | 9.1       |
